# Supplementary material for: Trade-off between constitutive and inducible resistance against herbivores is only partially explained by gene expression and glucosinolate production
Source: PubMed Central journal article supplement (PMC4986863; doi:10.1093/jxb/erv033), 2015-02-25
Supplement: supp_erv033_jexbot138784_file001.pdf [file supp_erv033_jexbot138784_file001.pdf]

Trade-off between constitutive and inducible resistance against herbivores is only partially explained by gene expression and glucosinolate production

Sergio Rasmann, Estelle Chassin, Julia Bilat, Gaétan Glauser, Philippe Reymond

### Supplementary information

Table S1. Genes known to be inducible after chewing herbivore attack in Arabidopsis. Those genes were used for the classification of 34 Arabidopsis accessions based on constitutive gene expression levels, and the selection of the seven accessions used for the experiments.

| Function       | AGI                         | Short Description (TAIR10)                                   |                     |
|----------------|-----------------------------|--------------------------------------------------------------|---------------------|
| Glucosinolates | At4g39950                   | CYP79B2 (cytochrome P450)                                    |                     |
|                | At1g74100                   | SOT16 (sulfotransferase)                                     |                     |
|                | At5g60890                   | MYB34 (transcription factor)                                 |                     |
|                | At3g16390                   | NSP3 (nitrile specifier protein 3)                           |                     |
|                | At1g52030                   | MBP2 (myrosinase-binding protein)                            |                     |
|                | At2g39330                   | Jacalin lectin family protein, myrosinase-associated protein |                     |
|                | At3g16470                   | Jacalin lectin family protein, myrosinase-associated protein |                     |
|                | At1g54000                   | GDSL-like lipase, myrosinase-associated protein              |                     |
|                | JA synthesis and signalling | At1g17420                                                    | LOX3 (lipoxygenase) |
|                |                             | At1g72520                                                    | LOX4 (lipoxygenase) |
| At5g07010      |                             | ST2A (hydroxyjasmonate sulfotransferase)                     |                     |
| At5g13220      |                             | JAZ10 (jasmonate-ZIM-domain protein)                         |                     |
| JA marker      | At5g44420                   | PDF1.2 (low-molecular-weight cysteine-rich 77)               |                     |
|                | At1g12240                   | Vacuolar invertase betaFruct4                                |                     |
|                | At2g24850                   | TAT3 (tyrosine aminotransferase 3); transaminase             |                     |
|                | At5g24420                   | Glucosamine/galactosamine-6-phosphate isomerase-related      |                     |

Table S2. Constitutive expression of genes involved in glucosinolate biosynthesis and regulation, and in jasmonate biosynthesis, signaling, and response, for seven Arabidopsis accessions.

| Type           | AGI ID       | C-24      | Kin-0   | SH      | HR-5   | Col-0   | ND-1    | Ms-0  |      |
|----------------|--------------|-----------|---------|---------|--------|---------|---------|-------|------|
| Glucosinolates | At4g39950    | 254.77    | 635.1   | 524.33  | 371.7  | 285.2   | 242.6   | 201.5 |      |
|                | At1g74100    | 704.87    | 706.67  | 1017.97 | 632.4  | 450.37  | 681.07  | 492   |      |
|                | At5g60890    | 212.67    | 169.9   | 203.87  | 264.6  | 226.37  | 143.7   | 120.7 |      |
|                | At3g16390    | 2087.93   | 1667.5  | 1149.27 | 747.6  | 1601.1  | 1325.47 | 970.5 |      |
|                | At1g52030    | 12.33     | 28.83   | 309.37  | 24.3   | 28.63   | 40.3    | 49.6  |      |
|                | At2g39330    | 15.23     | 20.57   | 15.37   | 7.2    | 16.43   | 10.83   | 20.9  |      |
|                | At3g16470    | 808.47    | 582.3   | 819.9   | 1048.4 | 632.03  | 725.13  | 358.3 |      |
|                | At1g54000    | 2079.9    | 1536.83 | 1370.87 | 1780.7 | 1459.83 | 1096.13 | 860.1 |      |
|                | JA synthesis | At1g17420 | 55.43   | 19.1    | 36.73  | 23.9    | 42.43   | 45.87 | 29.5 |
|                |              | At1g72520 | 10.73   | 8.97    | 29.23  | 13.3    | 14.03   | 13.43 | 6.2  |
| At5g07010      |              | 12.3      | 12.5    | 12.83   | 11.1   | 6.07    | 9.93    | 22    |      |
| At5g13220      |              | 69.63     | 86.2    | 58.57   | 91.1   | 54.2    | 64      | 50.6  |      |
| JA marker      | At5g44420    | 9.07      | 3.17    | 15.17   | 28.5   | 15      | 8.23    | 2     |      |
|                | At1g12240    | 659.97    | 944.67  | 659.53  | 931.9  | 811.13  | 684.23  | 444.3 |      |
|                | At2g24850    | 28.4      | 20.43   | 18.57   | 27.8   | 24.6    | 20.43   | 25.6  |      |
|                | At5g24420    | 94.47     | 104.1   | 222.87  | 153.4  | 141.03  | 323.43  | 196.1 |      |
| Average        |              | 541       | 483     | 447     | 406    | 435     | 397     | 283   |      |

Table S3. Constitutive (control treatment) and induced (*S. littoralis* and MeJA treatment) resistance of seven *A. thaliana* accessions against the specialist caterpillar *P. brassicae*, and the generalist caterpillar *S. littoralis*. Data represent averages ( $\pm$  SE) caterpillar dry weight.

| Induction treatment  | Accession | <i>P. brassicae</i> (mg) | <i>S. littoralis</i> (mg) |
|----------------------|-----------|--------------------------|---------------------------|
| Control              | C-24      | 0.899 $\pm$ 0.024        | 0.199 $\pm$ 0.026         |
|                      | Col-0     | 0.594 $\pm$ 0.029        | 0.26 $\pm$ 0.013          |
|                      | HR-5      | 0.826 $\pm$ 0.086        | 0.254 $\pm$ 0.01          |
|                      | Kin-0     | 0.725 $\pm$ 0.03         | 0.235 $\pm$ 0.01          |
|                      | Moscow-0  | 0.922 $\pm$ 0.026        | 0.42 $\pm$ 0.017          |
|                      | ND-1      | 0.784 $\pm$ 0.024        | 0.582 $\pm$ 0.057         |
|                      | SH        | 0.573 $\pm$ 0.065        | 0.211 $\pm$ 0.006         |
| <i>S. littoralis</i> | C-24      | 0.794 $\pm$ 0.045        | 0.201 $\pm$ 0.023         |
|                      | Col-0     | 0.427 $\pm$ 0.034        | 0.234 $\pm$ 0.011         |
|                      | HR-5      | 0.482 $\pm$ 0.053        | 0.233 $\pm$ 0.005         |
|                      | Kin-0     | 0.714 $\pm$ 0.05         | 0.157 $\pm$ 0.014         |
|                      | Moscow-0  | 0.681 $\pm$ 0.034        | 0.322 $\pm$ 0.028         |
|                      | ND-1      | 0.636 $\pm$ 0.022        | 0.359 $\pm$ 0.014         |
|                      | SH        | 0.808 $\pm$ 0.037        | 0.175 $\pm$ 0.015         |
| MeJA                 | C-24      | 0.971 $\pm$ 0.016        | 0.272 $\pm$ 0.03          |
|                      | Col-0     | 0.619 $\pm$ 0.066        | 0.257 $\pm$ 0.013         |
|                      | HR-5      | 0.628 $\pm$ 0.021        | 0.284 $\pm$ 0.041         |
|                      | Kin-0     | 0.376 $\pm$ 0.061        | 0.178 $\pm$ 0.003         |
|                      | Moscow-0  | 0.869 $\pm$ 0.043        | 0.265 $\pm$ 0.023         |
|                      | ND-1      | 0.744 $\pm$ 0.034        | 0.335 $\pm$ 0.03          |
|                      | SH        | 0.605 $\pm$ 0.01         | 0.209 $\pm$ 0.006         |

Table S4. Glucosinolate levels in four Arabidopsis accessions

|                                | Col-0           |                 | HR-5            |                 | Ms-0            |                 | Nd-1            |                 |
|--------------------------------|-----------------|-----------------|-----------------|-----------------|-----------------|-----------------|-----------------|-----------------|
| Glucosinolate                  | Control         | Induced         | Control         | Induced         | Control         | Induced         | Control         | Induced         |
| 2-propenyl                     | 0 +/- 0         | 0 +/- 0         | 0.017 +/- 0.006 | 0.024 +/- 0.004 | 0.839 +/- 0.244 | 0.743 +/- 0.140 | 0.005 +/- 0.001 | 0.005 +/- 0.003 |
| 3-hydroxypropyl                | 0.001 +/- 0.001 | 0 +/- 0         | 0.275 +/- 0.172 | 0.088 +/- 0.083 | 0 +/- 0         | 0.001 +/- 0.001 | 0.871 +/- 0.113 | 1.191 +/- 0.209 |
| 7-methylthioheptyl (7MTH)      | 0.026 +/- 0.002 | 0.027 +/- 0.001 | 0.050 +/- 0.011 | 0.059 +/- 0.012 | 0.025 +/- 0.003 | 0.033 +/- 0.010 | 0.020 +/- 0.002 | 0.023 +/- 0.002 |
| 8-methylthiooctyl (8MTO)       | 0.064 +/- 0.005 | 0.051 +/- 0.004 | 0.177 +/- 0.017 | 0.188 +/- 0.037 | 0.216 +/- 0.042 | 0.194 +/- 0.019 | 0.130 +/- 0.016 | 0.150 +/- 0.018 |
| glucobrassicinapin             | 0 +/- 0         | 0 +/- 0         | 0.033 +/- 0.011 | 0.041 +/- 0.008 | 0 +/- 0         | 0.006 +/- 0.006 | 0 +/- 0         | 0 +/- 0         |
| glucobrassicin (I3M)           | 0.181 +/- 0.027 | 0.586 +/- 0.163 | 0.154 +/- 0.017 | 0.203 +/- 0.015 | 0.117 +/- 0.025 | 0.226 +/- 0.030 | 0.228 +/- 0.027 | 0.424 +/- 0.080 |
| glucoerucin (4MTB)             | 0.190 +/- 0.026 | 0.132 +/- 0.019 | 0.003 +/- 0.002 | 0.004 +/- 0.002 | 0 +/- 0         | 0 +/- 0         | 0 +/- 0         | 0 +/- 0         |
| glucohirsutin (8MSOO)          | 0.116 +/- 0.017 | 0.106 +/- 0.010 | 0.334 +/- 0.040 | 0.344 +/- 0.055 | 0.534 +/- 0.128 | 0.397 +/- 0.041 | 0.272 +/- 0.058 | 0.311 +/- 0.070 |
| glucoiberin (3MSOP)            | 0.103 +/- 0.014 | 0.161 +/- 0.022 | 0.023 +/- 0.014 | 0.028 +/- 0.028 | 0.034 +/- 0.008 | 0.032 +/- 0.006 | 0.122 +/- 0.017 | 0.187 +/- 0.032 |
| gluconapin                     | 0.001 +/- 0.001 | 0 +/- 0         | 0.344 +/- 0.117 | 0.449 +/- 0.099 | 0.029 +/- 0.006 | 0.094 +/- 0.068 | 0 +/- 0         | 0 +/- 0         |
| glucoraphanin (4MSOB)          | 0.715 +/- 0.1   | 1.200 +/- 0.172 | 0.008 +/- 0.004 | 0.008 +/- 0.002 | 0 +/- 0         | 0.001 +/- 0.001 | 0.020 +/- 0.002 | 0.025 +/- 0.004 |
| glucotropeolin                 | 0 +/- 0         | 0 +/- 0         | 0 +/- 0         | 0 +/- 0         | 0 +/- 0         | 0 +/- 0         | 0 +/- 0         | 0 +/- 0         |
| methoxyglucobrassicin (4MOI3M) | 0.019 +/- 0.001 | 0.025 +/- 0.003 | 0.015 +/- 0.001 | 0.016 +/- 0.001 | 0.020 +/- 0.002 | 0.020 +/- 0.001 | 0.012 +/- 0     | 0.015 +/- 0.001 |
| neoglucobrassicin (1MOI3M)     | 0.003 +/- 0.002 | 0.039 +/- 0.010 | 0 +/- 0         | 0 +/- 0         | 0.004 +/- 0.003 | 0.011 +/- 0.002 | 0 +/- 0         | 0 +/- 0         |
| progoitrin isomer              | 0 +/- 0         | 0 +/- 0         | 0.097 +/- 0.032 | 0.130 +/- 0.028 | 0 +/- 0         | 0.045 +/- 0.045 | 0 +/- 0         | 0 +/- 0         |
| progoitrin                     | 0.001 +/- 0.001 | 0 +/- 0         | 0.302 +/- 0.101 | 0.405 +/- 0.088 | 0 +/- 0         | 0.143 +/- 0.143 | 0 +/- 0         | 0 +/- 0         |
| TOTAL                          | 1.420 +/- 0.197 | 2.327 +/- 0.404 | 1.832 +/- 0.545 | 1.987 +/- 0.462 | 1.818 +/- 0.461 | 1.946 +/- 0.513 | 1.680 +/- 0.236 | 2.331 +/- 0.419 |

Values ( $\mu\text{mol/g FW}$ ) are the mean ( $\pm\text{SE}$ ) of 6 measurements

Table S5. List of primers used in this study

|                     |     |                                 |
|---------------------|-----|---------------------------------|
| AOC2 (At3g25770)    | Fwd | 5'-CACGTCCCAGAGAAGAAAGG-3'      |
|                     | Rev | 3'-CGAGGAACGAATCCTCGTAA-3'      |
| CYP79B3 (At2g22330) | Fwd | 5'-CTTTGCTTACCGCTGATGAA-3'      |
|                     | Rev | 5'-GCGTTTGA TGGGTTGTCTG-3'      |
| VSP2 (At5g24770)    | Fwd | 5'-GGTGCCCGCAAATTGCAAAGACTA-3'  |
|                     | Rev | 5'-GGTTGATGCTCCGGTCCCTAACCA-3'  |
| SAND (At2g28390)    | Fwd | 5'-AACTCTATGCAGCATTTGATCCACT-3' |
|                     | Rev | 5'-TGATTGCATATCTTTATCGCCATC-3'  |

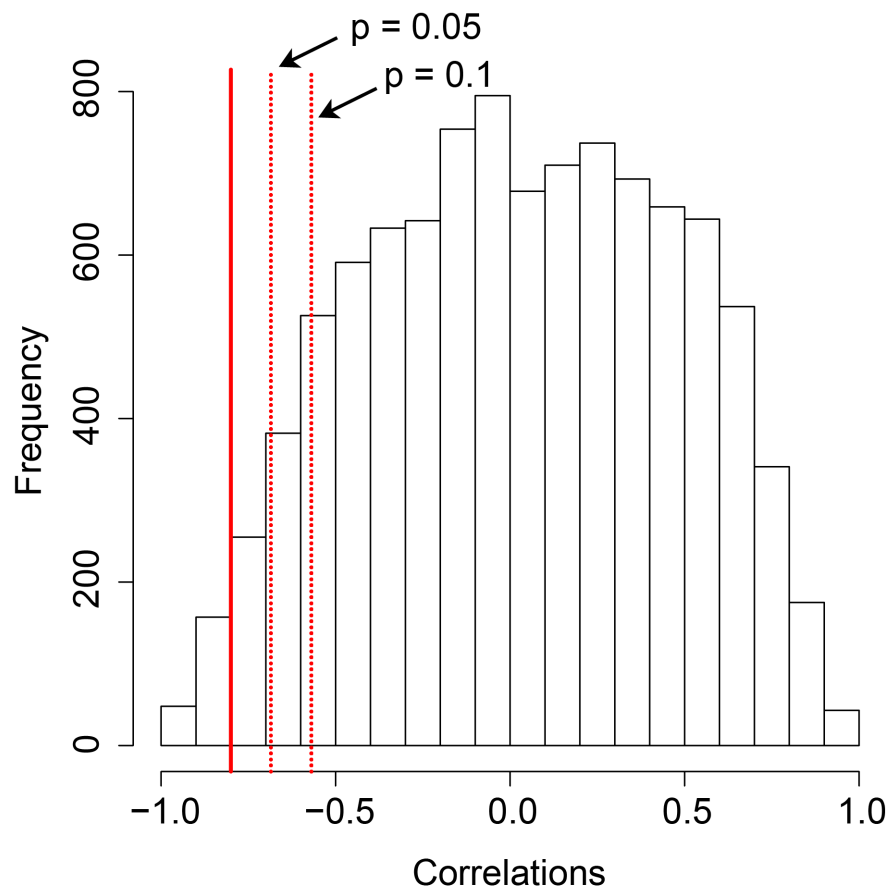

Figure S1. Selection of random genes. Shown is the histogram of correlations between the average of 10 randomly selected genes and the constitutive resistance against *S. littoralis* across seven *Arabidopsis* accessions. Solid line indicates the correlation coefficient for the 8 genes related to glucosinolate production. Dotted lines represent the 10% and 5% quantile for the 10000 correlations using random gene selection.
